# Supplementary material for: The embedding of fluorescent N-methyl-9-acridone into a topological new layered aluminophosphate SYSU-2 by one-pot synthesis
Source: Royal Society of Chemistry journal article supplement (doi:10.1039/d0dt03006f), 2020-01-01
Supplement: d0dt03006f1.pdf [file d0dt03006f1.pdf]

Supporting Information for

**The Embedding of Fluorescent N-methyl-9-acridone into a  
Topological New Layered Aluminophosphate SYSU-2 by One-Pot  
Synthesis**

Weichi Liang<sup>a</sup>, Jiali Wen<sup>a</sup>, Yukai Zhao<sup>a</sup>, Meng Zhang<sup>\*b</sup>, and Jiuxing Jiang <sup>\*a</sup>

---

<sup>a</sup>. MOE Key Laboratory of Bioinorganic and Synthetic Chemistry, School of Chemistry, Sun Yat-sen University, 501275, P. R. China. Email.

*jiangjiux@mail.sysu.edu.cn*

<sup>b</sup>. School of Chemical Engineering and Technology, Sun Yat-sen University, Zhuhai 519082, Guangdong, PR China. Email.

*zhangm85@mail.sysu.edu.cn.*

## Table of contents

|                                                                                                                                                                                |    |
|--------------------------------------------------------------------------------------------------------------------------------------------------------------------------------|----|
| Figure S1. Thermogravimetric analysis (TGA) curve of SYSU-2 .....                                                                                                              | 3  |
| Figure S2. Thermal ellipsoids (50% probability) of a section of the structure of SYSU-2.....                                                                                   | 4  |
| Figure S3. <sup>19</sup> F MAS NMR spectrum of SYSU-2.....                                                                                                                     | 5  |
| Figure S4. Fluorescence of NMA in DMSO solution of different concentrations under 365 nm UV irradiation. ....                                                                  | 6  |
| Figure S5. The emission spectra of SYSU-2 and NMA under 365 nm irradiation.....                                                                                                | 7  |
| Table S1. Crystal data and structure refinement for SYSU-2. ....                                                                                                               | 9  |
| Table S2. Fractional Atomic Coordinates ( $\times 10^5$ ) of Al, P, O, C, N, F, and Equivalent Isotropic Displacement Parameter ( $\text{\AA}^2 \times 10^3$ ) for SYSU-2..... | 10 |
| Table S3. Selected Bond Lengths and Angles for SYSU-2.....                                                                                                                     | 11 |
| Table S4. Hydrogen Bonds for SYSU-2. ....                                                                                                                                      | 12 |
| Table S5. Coordination Sequence of the Layers. ....                                                                                                                            | 13 |
| Table S6. Crystal data and structure refinement for NMA. ....                                                                                                                  | 14 |

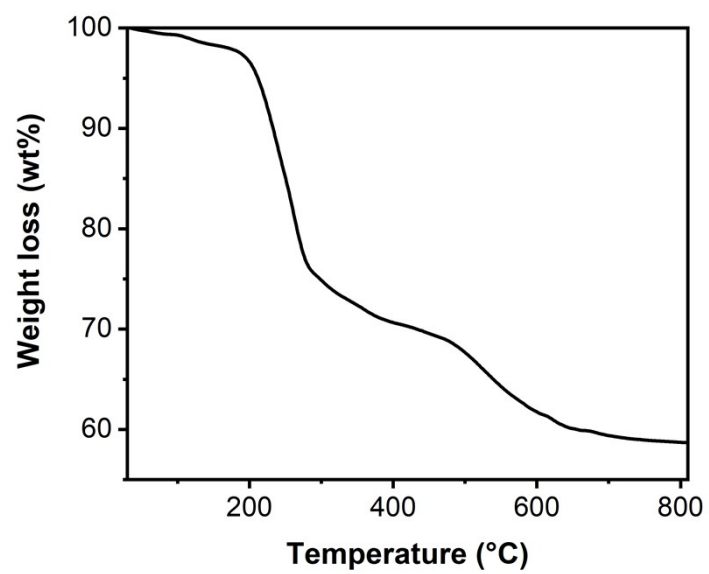

**Figure S1.** Thermogravimetric analysis (TGA) curve of SYSU-2.

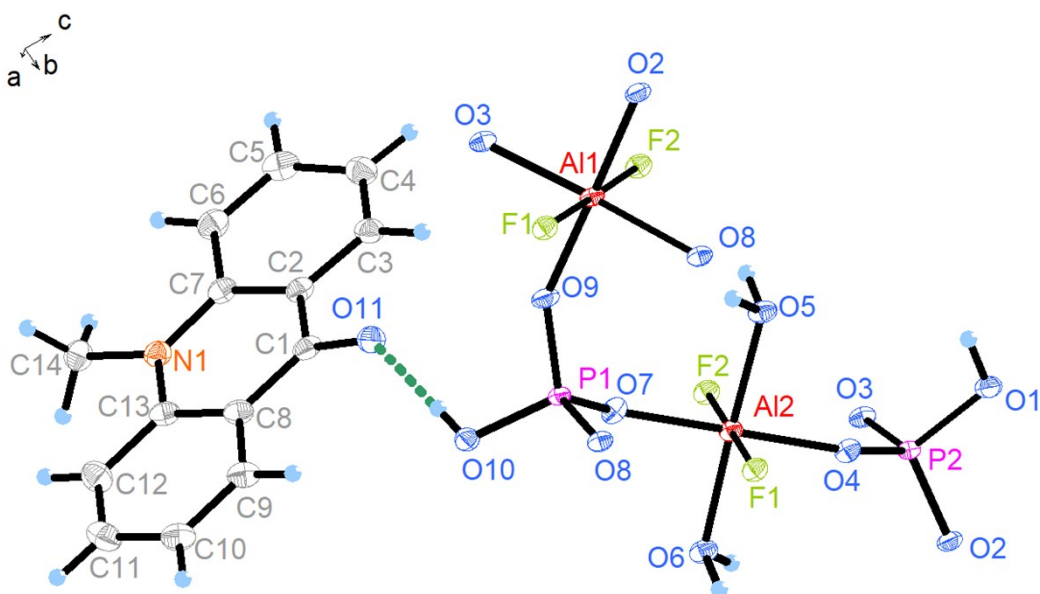

**Figure S2.** Thermal ellipsoids (50% probability) of a section of the structure of SYSU-2. The hydrogen bond is displayed as green dashed lines.

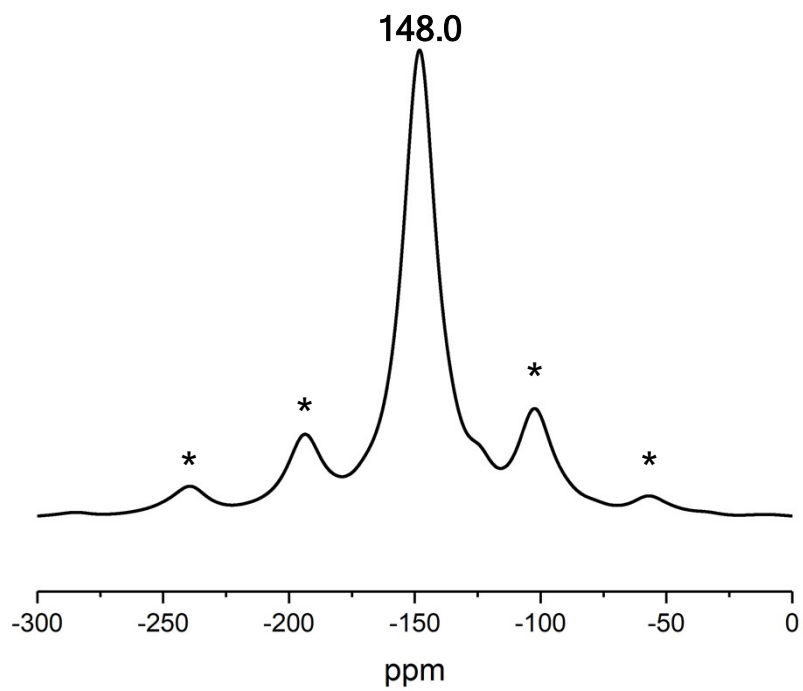

**Figure S3.**  $^{19}\text{F}$  MAS NMR spectrum of SYSU-2. (\*) indicates spinning sidebands.

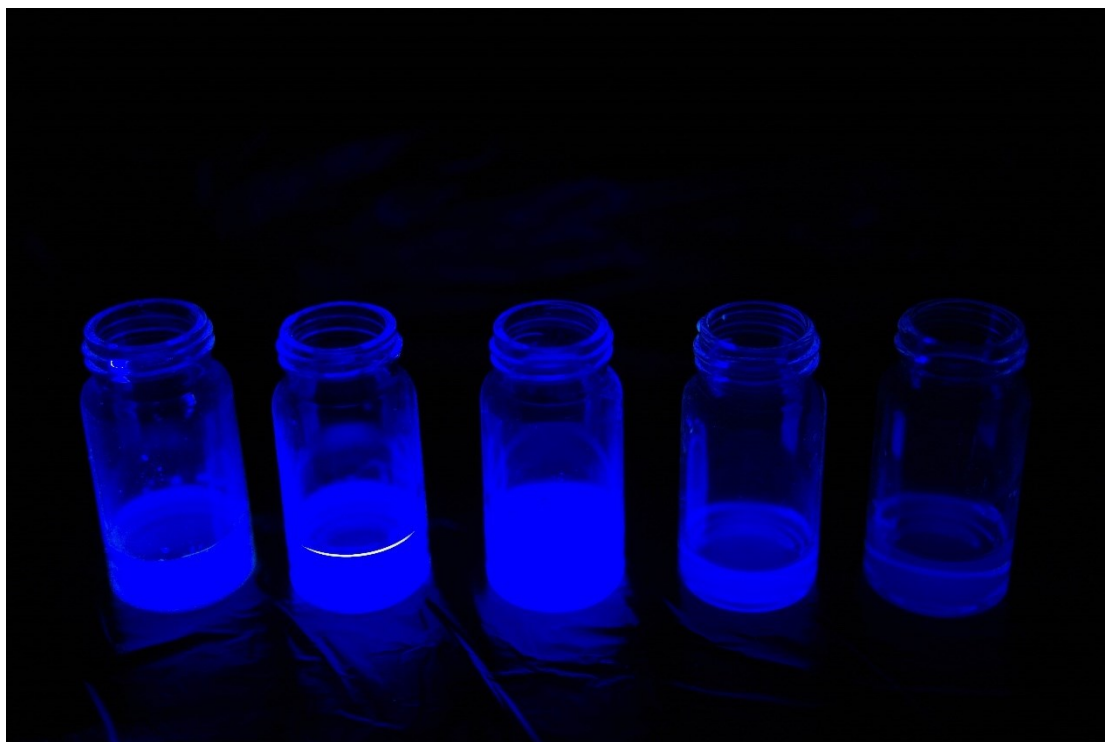

**Figure S4.** Fluorescence of NMA in DMSO solution of different concentrations under 365 nm UV irradiation. The concentration from left to right: saturated,  $10^{-3}$  M,  $10^{-4}$  M,  $10^{-5}$  M,  $10^{-6}$  M.

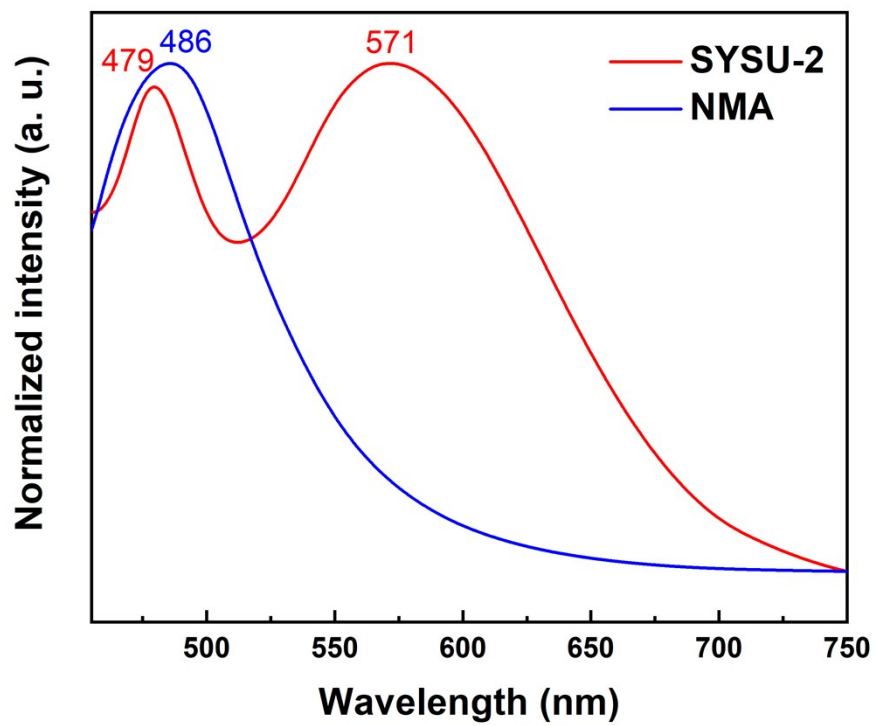

**Figure S5.** The emission spectra of SYSU-2 and NMA under 365 nm irradiation.

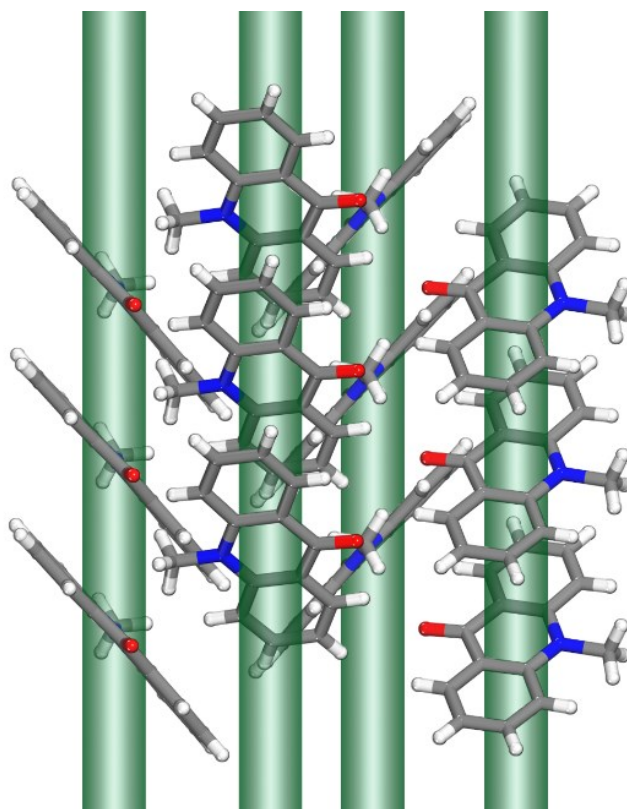

**Figure S6.** The view of NMA crystal structure. With  $\pi$ - $\pi$  interaction between neighboring NMA molecules, four independent NMA molecule rows in the structure are formed.



**Table S1.** Crystal data and structure refinement for SYSU-2.

|                              |                                   |                                         |                                                   |
|------------------------------|-----------------------------------|-----------------------------------------|---------------------------------------------------|
| <b>Empirical Formula</b>     | $C_{28}H_{34}N_2Al_4P_2F_4O_{22}$ | $\rho_{calc}/cm^3$                      | 2.008                                             |
| <b>Formula weight</b>        | 1058.37                           | $\mu/mm^{-1}$                           | 0.44                                              |
| <b>Temperature/K</b>         | 150(2)                            | <b>F(000)</b>                           | 540.0                                             |
| <b>Crystal system</b>        | triclinic                         | <b>Crystal size/mm<sup>3</sup></b>      | 0.1 × 0.05 × 0.03                                 |
| <b>Space group</b>           | P-1                               | <b>Radiation MoK<math>\alpha</math></b> | $\lambda=0.71073$                                 |
| <b>a/Å</b>                   | 6.9778(3)                         | <b>Index ranges</b>                     | -10 ≤ h ≤ 10, -12 ≤ k ≤ 12,<br>-17 ≤ l ≤ 17       |
| <b>b/Å</b>                   | 9.7904(4)                         | <b>2θ range for data collection/°</b>   | 2.809 to 56.974                                   |
| <b>c/Å</b>                   | 13.7290(5)                        | <b>Reflections collected</b>            | 15059                                             |
| <b>α/°</b>                   | 91.559(2)                         | <b>Independent reflections</b>          | 3537 [ $R_{int}=0.0579$ ,<br>$R_{sigma}=0.0645$ ] |
| <b>β/°</b>                   | 93.484(2)                         | <b>Data/restraints/parameters</b>       | 3537/1/294                                        |
| <b>γ/°</b>                   | 110.598(2)                        | <b>Goodness-of-fit on F<sup>2</sup></b> | 1.059                                             |
| <b>Volume/ Å<sup>3</sup></b> | 875.14(6)                         | <b>Final R indexes [I &gt; 2σ (I)]</b>  | $R_1=0.0456$ ,<br>$wR_2=0.1203$                   |
| <b>Z</b>                     | 1                                 | <b>Final R indexes [all data]</b>       | $R_1=0.0666$ ,<br>$wR_2=0.1302$                   |

**Table S2.** Fractional Atomic Coordinates ( $\times 10^5$ ) of Al, P, O, C, N, F, and Equivalent Isotropic Displacement Parameter ( $\text{\AA}^2 \times 10^3$ ) for SYSU-2.  $U_{\text{eq}}$  is defined as 1/3 of the trace of the orthogonalized  $U_{ij}$  tensor.

| Atom | x          | y           | z          | $U_{\text{eq}}$ | Atom | x        | y       | z          | $U_{\text{eq}}$ |
|------|------------|-------------|------------|-----------------|------|----------|---------|------------|-----------------|
| P1   | 8682.0(10) | 5163.7(7)   | 3691.5(5)  | 10.3(2)         | O11  | 5036(3)  | 3180(2) | 1841.9(14) | 18.7(5)         |
| P2   | 6187.9(10) | 9676.5(7)   | 6236.5(5)  | 10.5(2)         | N1   | 1278(3)  | 2131(2) | -706.5(17) | 17.5(5)         |
| Al1  | 7497.9(10) | 2500.5(7)   | 5113.0(6)  | 10.7(2)         | C1   | 3886(4)  | 2930(3) | 1049(2)    | 17.0(6)         |
| Al2  | 7499.5(10) | 7502.0(7)   | 4893.2(6)  | 11.3(2)         | C2   | 1695(4)  | 2330(3) | 1067(2)    | 16.5(6)         |
| F1   | 10177(2)   | 7859.6(15)  | 5214.6(11) | 13.3(3)         | C3   | 773(4)   | 2195(3) | 1964(2)    | 18.7(6)         |
| F2   | 4832(2)    | 7145.9(15)  | 4566.1(11) | 13.9(4)         | C4   | -1294(4) | 1542(3) | 2004(2)    | 21.9(7)         |
| O1   | 6033(3)    | 9427.5(19)  | 7348.9(13) | 15.4(4)         | C5   | -2517(5) | 944(3)  | 1135(2)    | 23.4(7)         |
| O2   | 7224(3)    | 11310.5(18) | 6164.7(13) | 13.4(4)         | C6   | -1691(4) | 1105(3) | 246(2)     | 21.4(7)         |
| O3   | 4017(3)    | 9113.3(18)  | 5735.6(13) | 12.8(4)         | C7   | 433(4)   | 1858(3) | 184(2)     | 17.5(6)         |
| O4   | 7544(3)    | 8882.7(18)  | 5846.3(13) | 13.4(4)         | C8   | 4696(4)  | 3191(3) | 109(2)     | 17.0(6)         |
| O5   | 6807(3)    | 6010.9(18)  | 5858.5(5)  | 15(4)           | C9   | 6829(4)  | 3853(3) | 35(2)      | 21.1(7)         |
| O6   | 8228(3)    | 9039.9(19)  | 3965.5(13) | 15.3(4)         | C10  | 7637(4)  | 4099(3) | -858(2)    | 23.1(7)         |
| O7   | 7445(3)    | 6119.8(19)  | 3940.9(14) | 15.1(4)         | C11  | 6318(5)  | 3645(3) | -1706(2)   | 25.1(7)         |
| O8   | 10931(3)   | 5857.4(18)  | 4069.8(13) | 12.4(4)         | C12  | 4253(5)  | 3002(3) | -1665(2)   | 23.2(7)         |
| O9   | 7660(3)    | 3651.4(19)  | 4059.6(14) | 14.9(4)         | C13  | 3374(4)  | 2776(3) | -754(2)    | 17.6(6)         |
| O10  | 8661(3)    | 5008.4(19)  | 2558(13)   | 15.1(4)         | C14  | -47(4)   | 1669(3) | -1618(2)   | 21.4(7)         |

**Table S3.** Selected Bond Lengths and Angles for SYSU-2.

| <b>Bond</b> | <b>Length/ Å</b> | <b>Bond</b>         | <b>Length/ Å</b> | <b>Bond</b> | <b>Length/ Å</b> |
|-------------|------------------|---------------------|------------------|-------------|------------------|
| P1-O8       | 1.5251(19)       | Al1-F1 <sup>1</sup> | 1.8549(15)       | Al2-O4      | 1.8465(19)       |
| P1-O10      | 1.5581(19)       | Al1-F2 <sup>2</sup> | 1.8522(15)       | Al2-O6      | 1.9473(18)       |
| P1-O7       | 1.5249(18)       | Al1-O8 <sup>1</sup> | 1.8861(19)       | Al2-O7      | 1.8448(19)       |
| P1-O9       | 1.5160(18)       | Al1-O3 <sup>2</sup> | 1.8830(19)       | Al2-O5      | 1.9513(18)       |
| P2-O3       | 1.5289(19)       | Al1-O2 <sup>3</sup> | 1.8567(18)       | O11-C1      | 1.276(3)         |
| P2-O4       | 1.5308(18)       | Al1-O9              | 1.8419(18)       | N1-C13      | 1.380(3)         |
| P2-O2       | 1.5149(18)       | Al2-F1              | 1.7998(16)       | N1-C7       | 1.382(3)         |
| P2-O1       | 1.5574(19)       | Al2-F2              | 1.7950(16)       | N1-C14      | 1.470(4)         |

  

| <b>Atom</b>                          | <b>Angle/°</b> | <b>Atom</b>                          | <b>Angle/°</b> | <b>Atom</b>             | <b>Angle/°</b> |
|--------------------------------------|----------------|--------------------------------------|----------------|-------------------------|----------------|
| O8-P1-O10                            | 106.31(10)     | F2 <sup>2</sup> -Al1-O2 <sup>3</sup> | 89.19(7)       | F1-Al2-O5               | 89.06(7)       |
| O7-P1-O8                             | 112.15(10)     | O3 <sup>2</sup> -Al1-O8 <sup>1</sup> | 178.16(8)      | F2-Al2-F1               | 179.71(7)      |
| O7-P1-O10                            | 108.26(10)     | O2 <sup>3</sup> -Al1-O8 <sup>1</sup> | 90.26(8)       | F2-Al2-O4               | 90.87(8)       |
| O9-P1-O8                             | 112.61(10)     | O2 <sup>3</sup> -Al1-O3 <sup>2</sup> | 91.22(8)       | F2-Al2-O6               | 89.58(7)       |
| O9-P1-O10                            | 107.86(10)     | O9-Al1-F1 <sup>1</sup>               | 90.79(8)       | F2-Al2-O7               | 88.95(8)       |
| O9-P1-O7                             | 109.44(10)     | O9-Al1-F2 <sup>2</sup>               | 89.09(8)       | F2-Al2-O5               | 91.16(7)       |
| O3-P2-O4                             | 112.62(10)     | O9-Al1-O8 <sup>1</sup>               | 91.12(8)       | P2-O2-Al1 <sup>4</sup>  | 131.70(12)     |
| O3-P2-O1                             | 108.32(10)     | O9-Al1-O3 <sup>2</sup>               | 87.43(8)       | P1-O9-Al1               | 144.67(13)     |
| O4-P2-O1                             | 108.13(10)     | O9-Al1-O2 <sup>3</sup>               | 177.76(8)      | P1-O8-Al1 <sup>1</sup>  | 135.75(11)     |
| O2-P2-O3                             | 111.98(10)     | O6-Al2-O5                            | 178.08(8)      | P2-O3-Al1 <sup>2</sup>  | 134.77(11)     |
| O2-P2-O4                             | 109.94(10)     | O7-Al2-O4                            | 179.80(8)      | P2-O4-Al2               | 140.79(12)     |
| O2-P2-O1                             | 105.50(10)     | O7-Al2-O6                            | 91.37(8)       | P1-O7-Al2               | 138.34(12)     |
| F1 <sup>1</sup> -Al1-O8 <sup>1</sup> | 92.04(8)       | O7-Al2-O5                            | 90.42(8)       | C13-N1-C7               | 120.7(2)       |
| F1 <sup>1</sup> -Al1-O3 <sup>2</sup> | 86.84(8)       | O4-Al2-O6                            | 88.70(8)       | C13-N1-C14              | 119.2(2)       |
| F1 <sup>1</sup> -Al1-O2 <sup>3</sup> | 90.92(7)       | O4-Al2-O5                            | 89.51(8)       | Al2-F1-Al1 <sup>1</sup> | 145.68(10)     |
| F2 <sup>2</sup> -Al1-F1 <sup>1</sup> | 179.68(8)      | F1-Al2-O4                            | 89.33(8)       | Al2-F2-Al1 <sup>2</sup> | 145.76(10)     |
| F2 <sup>2</sup> -Al1-O8 <sup>1</sup> | 88.25(8)       | F1-Al2-O6                            | 90.21(7)       |                         |                |
| F2 <sup>2</sup> -Al1-O3 <sup>2</sup> | 92.86(8)       | F1-Al2-O7                            | 90.85(8)       |                         |                |

<sup>1</sup>2-X,1-Y,1-Z; <sup>2</sup>1-X,1-Y,1-Z; <sup>3</sup>+X,-1+Y,+Z; <sup>4</sup>+X,1+Y,+Z

**Table S4.** Hydrogen Bonds for SYSU-2.

| <b>D-H...A</b> | <b><i>d</i>(D-H)/Å</b> | <b><i>d</i>(H...A)/Å</b> | <b><i>d</i>(D...A)/Å</b> | <b>∠(DHA)/°</b> |
|----------------|------------------------|--------------------------|--------------------------|-----------------|
| O1-H1...O11    | 0.839                  | 1.897                    | 2.687                    | 163.68          |
| O10-H6...O11   | 0.840                  | 1.806                    | 2.643                    | 173.77          |
| O6-H5...O4     | 0.884                  | 2.053                    | 2.926                    | 172.33          |
| O6-H4...O3     | 0.884                  | 1.930                    | 2.814                    | 179.49          |
| O5-H3...O8     | 0.874                  | 1.953                    | 2.805                    | 175.19          |
| O5-H2...O7     | 0.872                  | 2.169                    | 3.001                    | 164.97          |

**Table S5.** Coordination Sequence of the Layers.

| Name                          | Coordination Sequence |    |    |    |    |    |    |    |    |    |
|-------------------------------|-----------------------|----|----|----|----|----|----|----|----|----|
| <b>UiO-15-as</b>              | 3                     | 9  | 15 | 18 | 26 | 26 | 37 | 35 | 46 | 46 |
| <b>2.1.1.2.001</b>            | 5                     | 9  | 15 | 19 | 24 | 29 | 33 | 39 | 43 | 48 |
| <b>UiO-15-125</b>             | 3                     | 9  | 15 | 18 | 26 | 26 | 37 | 35 | 46 | 46 |
| <b>2.1.1.14.001</b>           | 5                     | 9  | 15 | 19 | 24 | 29 | 33 | 39 | 43 | 48 |
| <b>UiO-18-as</b>              | 3                     | 9  | 15 | 18 | 26 | 26 | 37 | 35 | 46 | 46 |
| <b>2.1.1.62.002</b>           | 5                     | 9  | 15 | 19 | 24 | 29 | 33 | 39 | 43 | 48 |
| <b>UiO-18-100</b>             | 3                     | 9  | 15 | 18 | 26 | 26 | 37 | 35 | 46 | 46 |
| <b>2.1.1.14.003</b>           | 5                     | 9  | 15 | 19 | 24 | 29 | 33 | 39 | 43 | 48 |
| <b>AlF(HPO<sub>4</sub>)</b>   | 3                     | 9  | 15 | 18 | 26 | 26 | 37 | 35 | 46 | 46 |
| <b>2.1.1.14.005</b>           | 5                     | 9  | 15 | 19 | 24 | 29 | 33 | 39 | 43 | 48 |
| <b>2.1.1.14.006</b>           | 3                     | 9  | 15 | 18 | 26 | 26 | 37 | 35 | 46 | 46 |
|                               | 5                     | 9  | 15 | 19 | 24 | 29 | 33 | 39 | 43 | 48 |
| <b>AlPO-CJ9</b>               | 3                     | 9  | 15 | 18 | 26 | 26 | 37 | 35 | 46 | 46 |
| <b>2.1.1.14.007</b>           | 5                     | 9  | 15 | 19 | 24 | 29 | 33 | 39 | 43 | 48 |
| <b>AlMepO-zeta</b>            | 3                     | 9  | 15 | 18 | 26 | 26 | 37 | 35 | 46 | 46 |
| <b>2.1.1.14.008</b>           | 5                     | 9  | 15 | 19 | 24 | 29 | 33 | 39 | 43 | 48 |
| <b>2.1.1.29.001</b>           | 3                     | 9  | 15 | 18 | 26 | 26 | 37 | 35 | 46 | 46 |
|                               | 5                     | 9  | 15 | 19 | 24 | 29 | 33 | 39 | 43 | 48 |
| <b>APDAP150</b>               | 3                     | 9  | 15 | 18 | 26 | 26 | 37 | 35 | 46 | 46 |
| <b>2.1.1.62.001</b>           | 5                     | 9  | 15 | 19 | 24 | 29 | 33 | 39 | 43 | 48 |
| <b>APDAP<sub>12</sub>-150</b> | 3                     | 9  | 15 | 18 | 26 | 26 | 37 | 35 | 46 | 46 |
| <b>2.1.1.29.002</b>           | 5                     | 9  | 15 | 19 | 24 | 29 | 33 | 39 | 43 | 48 |
| <b>SYSU-2</b>                 | 6                     | 8  | 18 | 16 | 30 | 24 | 42 | 32 | 54 | 40 |
|                               | 4                     | 10 | 14 | 22 | 22 | 34 | 30 | 46 | 38 | 58 |
|                               | 3                     | 10 | 14 | 22 | 22 | 34 | 30 | 46 | 38 | 58 |

**Table S6.** Crystal data and structure refinement for NMA.

|                              |                                               |                                                          |                                                            |
|------------------------------|-----------------------------------------------|----------------------------------------------------------|------------------------------------------------------------|
| <b>Empirical Formula</b>     | C <sub>14</sub> H <sub>11</sub> NO            | <b><math>\rho_{\text{calc}}/\text{cm}^3</math></b>       | 1.409                                                      |
| <b>Formula weight</b>        | 209.24                                        | <b><math>\mu/\text{mm}^{-1}</math></b>                   | 0.707                                                      |
| <b>Temperature/K</b>         | 150(10)                                       | <b>F(000)</b>                                            | 440.0                                                      |
| <b>Crystal system</b>        | orthorhombic                                  | <b>Crystal size/mm<sup>3</sup></b>                       | 0.45×0.2×0.11                                              |
| <b>Space group</b>           | P2 <sub>1</sub> 2 <sub>1</sub> 2 <sub>1</sub> | <b>Radiation CuK<math>\alpha</math></b>                  | $\lambda=1.54184$                                          |
| <b>a/Å</b>                   | 5.05224(5)                                    | <b>Index ranges</b>                                      | -5≤h≤6, -15≤k≤17, -18≤l≤18                                 |
| <b>b/Å</b>                   | 13.52734(14)                                  | <b>2<math>\theta</math> range for data collection/°</b>  | 8.962 to 152.416                                           |
| <b>c/Å</b>                   | 14.42744(14)                                  | <b>Reflections collected</b>                             | 21847                                                      |
| <b><math>\alpha</math>/°</b> | 90                                            | <b>Independent reflections</b>                           | 2052[R <sub>int</sub> =0.0375, R <sub>sigma</sub> =0.0129] |
| <b><math>\beta</math>/°</b>  | 90                                            | <b>Data/restraints/parameters</b>                        | 2052/0/147                                                 |
| <b><math>\gamma</math>/°</b> | 10                                            | <b>Goodness-of-fit on F<sup>2</sup></b>                  | 1.074                                                      |
| <b>Volume/ Å<sup>3</sup></b> | 986.021(17)                                   | <b>Final R indexes [I &gt; 2<math>\sigma</math> (I)]</b> | R <sub>1</sub> =0.0292, wR <sub>2</sub> =0.0829            |
| <b>Z</b>                     | 4                                             | <b>Final R indexes [all data]</b>                        | R <sub>1</sub> =0.0294, wR <sub>2</sub> =0.0831            |
